# Supplementary material for: Loss of Tumor Suppressor ARID1A Protein Expression Correlates with Poor Prognosis in Patients with Primary Breast Cancer
Source: PubMed Central journal article supplement — J Breast Cancer. 2015 Dec 23;18(4):339–46. doi: 10.4048/jbc.2015.18.4.339 (PMC4705085; doi:10.4048/jbc.2015.18.4.339), 2015-12-23
Supplement: jbc-18-339-s001.pdf [file jbc-18-339-s001.pdf]

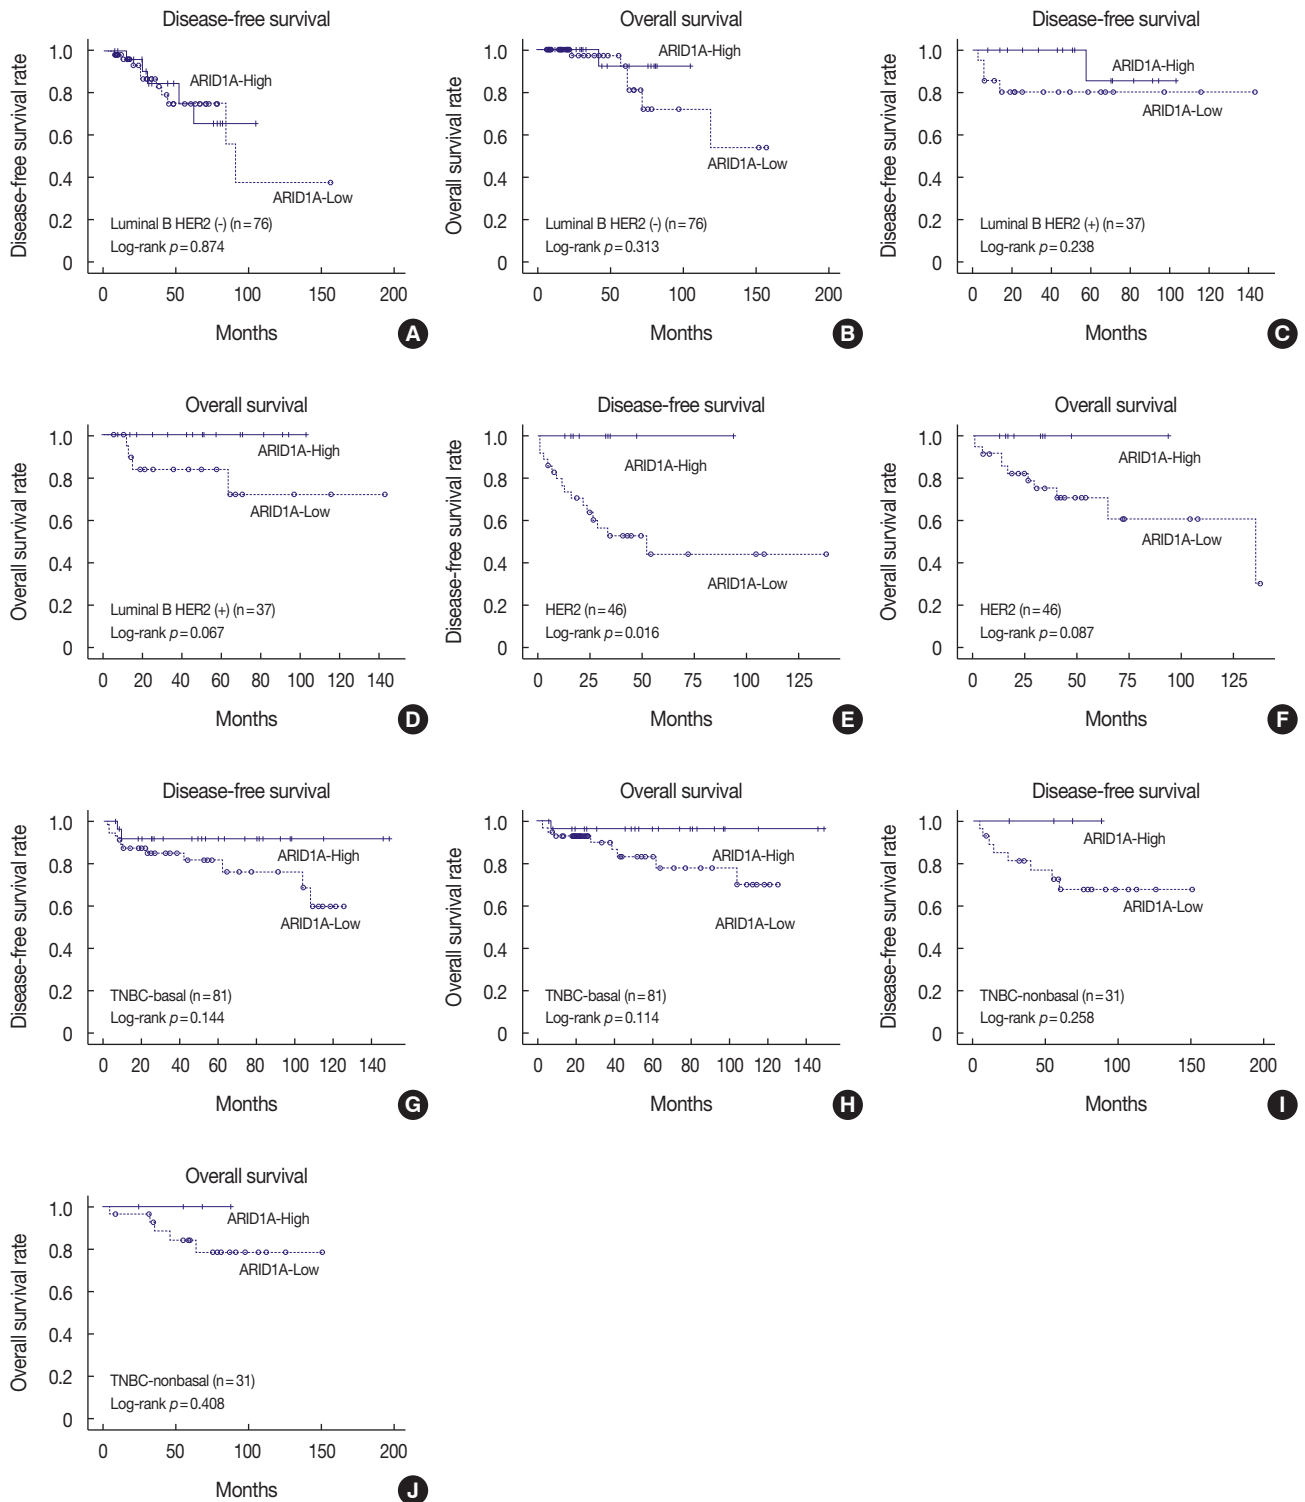

**Supplementary Figure 1.** Kaplan-Meier survival curve for AT-rich interactive domain 1A (ARID1A) according to the luminal B, human epidermal growth factor receptor 2 (HER2), and triple-negative breast cancer (TNBC) subtype. (A) Disease-free survival ( $p=0.874$ ) and (B) overall survival ( $p=0.313$ ) in patients with in luminal B, HER2 negative type (n=76). (C) Disease-free survival ( $p=0.238$ ) and (D) overall survival ( $p=0.067$ ) in patients with in luminal B, HER2 positive type (n=37). (E) Disease-free survival ( $p=0.016$ ) and (F) overall survival ( $p=0.087$ ) in patients with in HER2 type (n=46). (G) Disease-free survival ( $p=0.144$ ) and (H) overall survival ( $p=0.114$ ) in patients with in TNBC basal type (n=81). (I) Disease-free survival ( $p=0.258$ ) and (J) overall survival ( $p=0.408$ ) in patients with in TNBC nonbasal type (n=31).
